# Supplementary material
Source: publisher figshare collection journal article supplement (https://gsapubs.figshare.com/articles/dataset/_/12533381)

# GSA Supplemental Data Item 2016070

GSA Today science article v. 26, no. 6, doi: 10.1130/GSATG269A.1

**Supplementary Table 1:** Cosmogenic nuclide surface exposure dating input values and results. Table format follows data entry requirements for the CRONUS online exposure age calculator, for further details see Balco et al. (2008).

| Sample | Latitude | Longitude  | Elevation | Thickness | Density            | Shielding factor | Erosion rate       | $^{10}\text{Be}$      | +/-                   | Exposure age <sup>1</sup> | External uncertainty |
|--------|----------|------------|-----------|-----------|--------------------|------------------|--------------------|-----------------------|-----------------------|---------------------------|----------------------|
|        | DD       | DD         | m         | cm        | g cm <sup>-2</sup> |                  | cm a <sup>-1</sup> | atoms g <sup>-1</sup> | atoms g <sup>-1</sup> | a                         | a                    |
| Z-1    | 37.23291 | -112.96532 | 1386.6    | 1.50      | 2.20               | 0.9629           | 0.001              | 66409                 | 26069                 | 6619                      | 2745                 |
| Z-2    | 37.23460 | -112.96555 | 1382.1    | 1.50      | 2.20               | 0.9620           | 0.001              | 50126                 | 12289                 | 5141                      | 1333                 |
| Z-3    | 37.23130 | -112.96959 | 1437.7    | 1.75      | 2.20               | 0.9510           | 0.001              | 43369                 | 11550                 | 4378                      | 1223                 |
| Z-4    | 37.22537 | -112.97613 | 1398.1    | 2.00      | 2.20               | 0.9342           | 0.001              | 80512                 | 16405                 | 8266                      | 1837                 |
| Z-5    | 37.22304 | -112.97697 | 1387.2    | 1.50      | 2.20               | 0.9468           | 0.001              | 40201                 | 8457                  | 4229                      | 941                  |
| Z-6    | 37.22390 | -112.97637 | 1388.9    | 2.00      | 2.20               | 0.9459           | 0.001              | 46174                 | 8454                  | 4828                      | 947                  |
| Z-7    | 37.22662 | -112.97212 | 1434.6    | 1.75      | 2.20               | 0.9639           | 0.001              | 47223                 | 7683                  | 4693                      | 824                  |
| Z-8    | 37.22761 | -112.97120 | 1440.2    | 1.50      | 2.20               | 0.9656           | 0.001              | 68384                 | 9940                  | 6546                      | 1051                 |
| Z-9a   | 37.23106 | -112.96649 | 1400.4    | 1.50      | 2.20               | 0.9673           | 0.001              | 45759                 | 8459                  | 4639                      | 916                  |
| Z-9b   | 37.23135 | -112.96682 | 1403.5    | 1.50      | 2.20               | 0.9675           | 0.001              | 46333                 | 9873                  | 4683                      | 1058                 |
| Z-10a  | 37.21935 | -112.97224 | 1291.4    | 2.00      | 2.20               | 0.9665           | 0.001              | 52935                 | 10341                 | 5729                      | 1201                 |
| Z-10b  | 37.21871 | -112.97259 | 1282.8    | 2.00      | 2.20               | 0.9698           | 0.001              | 42800                 | 9173                  | 4720                      | 1073                 |

<sup>1</sup> Values calculated using the Northeast North America calibration data set (Balco et al., 2009) and a time-dependent spallation production model (Lal, 1991; Stone, 2000)

**Deposit thickness  
meters**

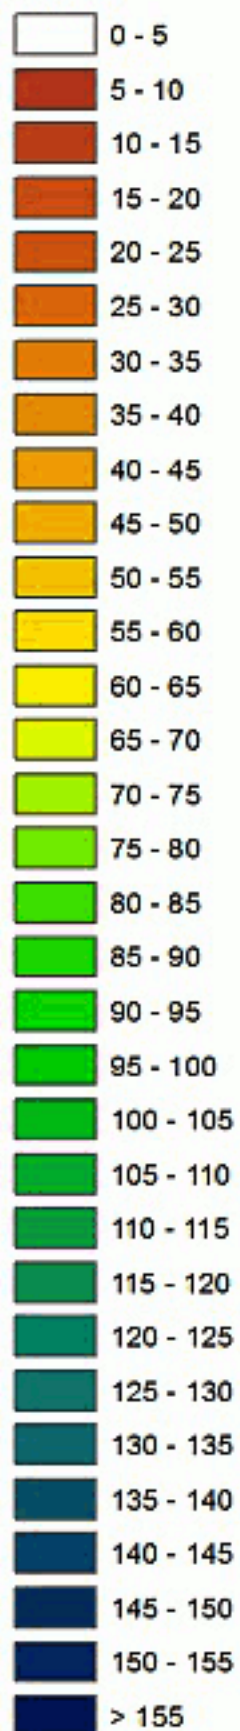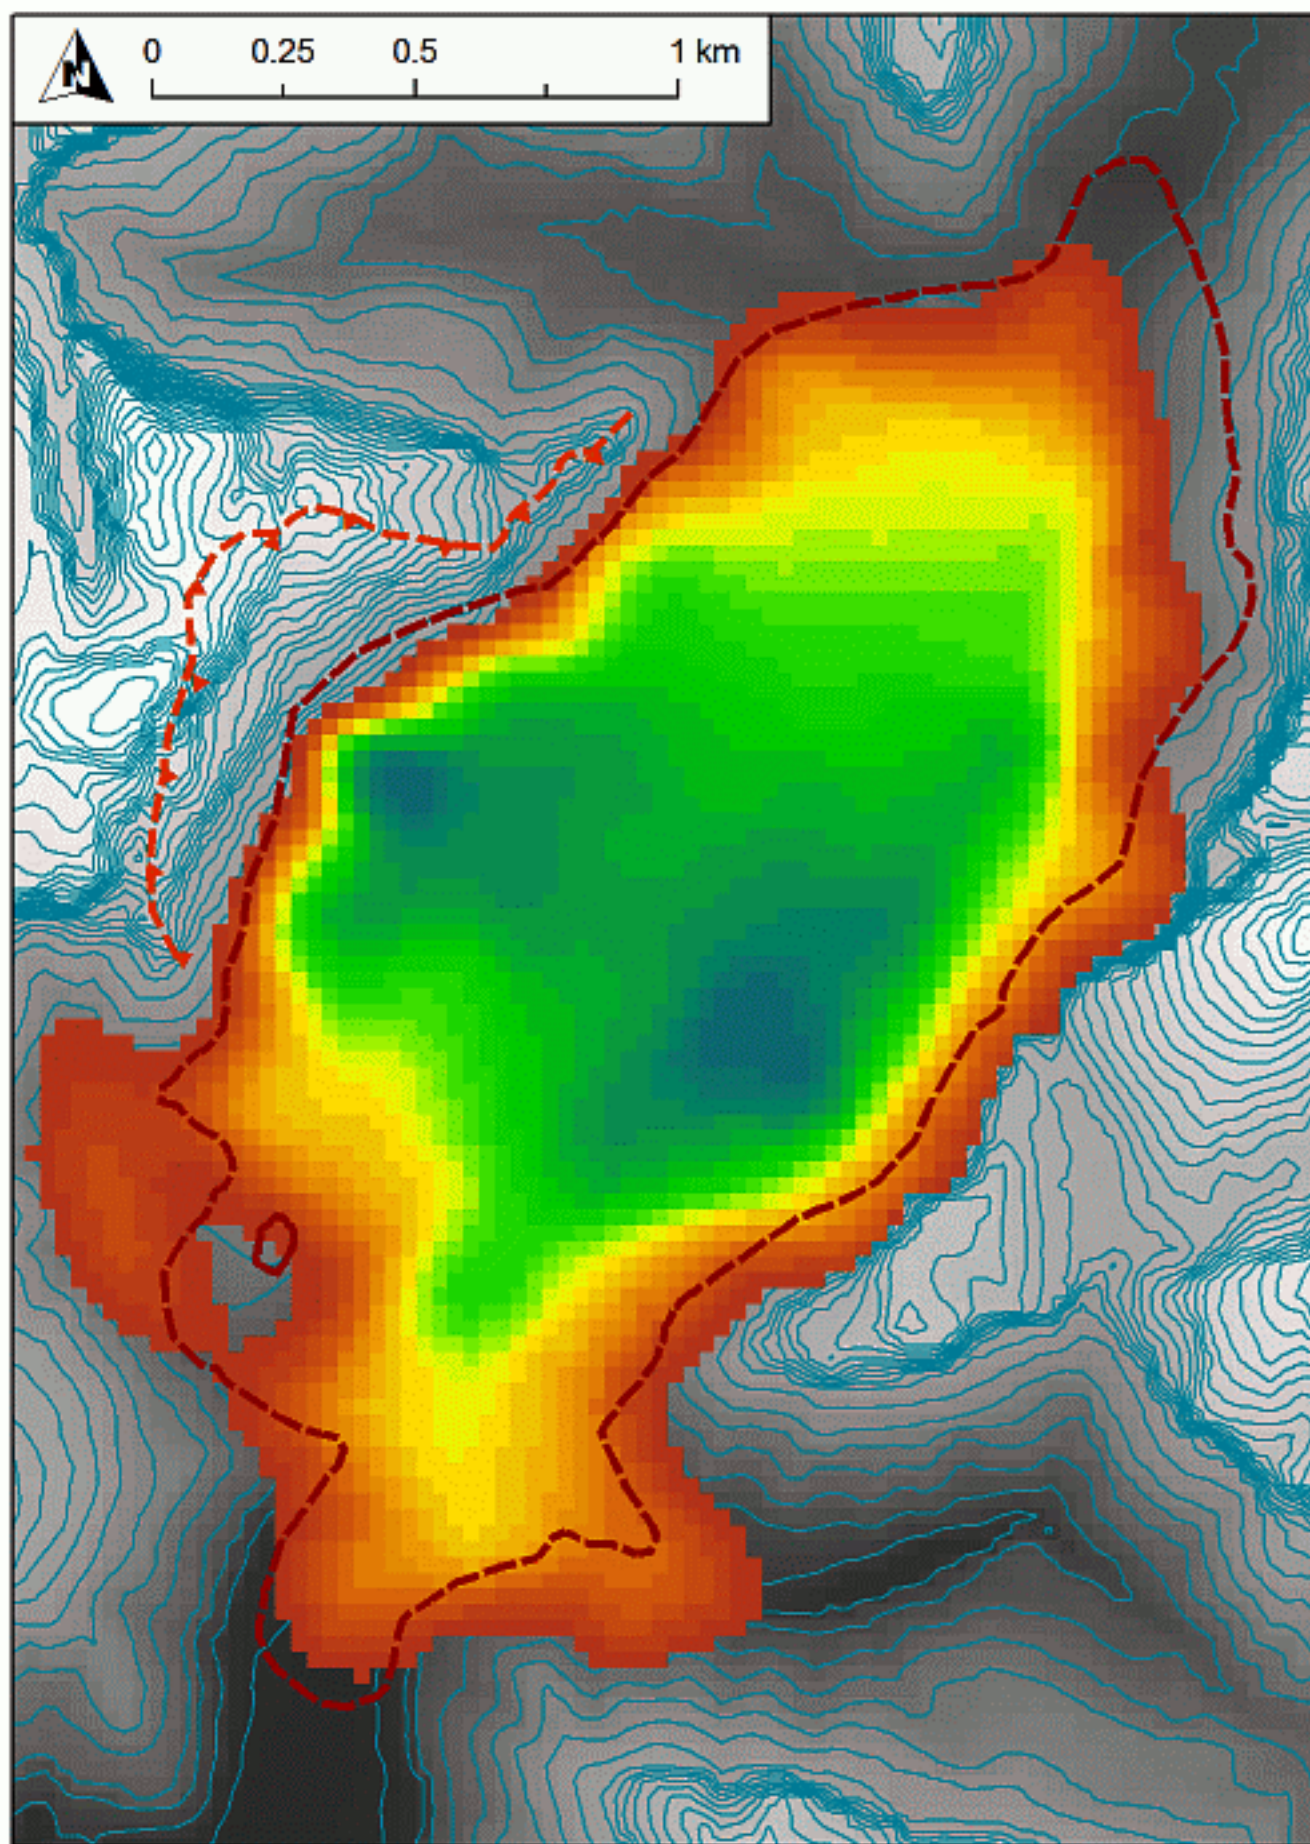

Supplemental Figure S1 static version; [click for animation](#).



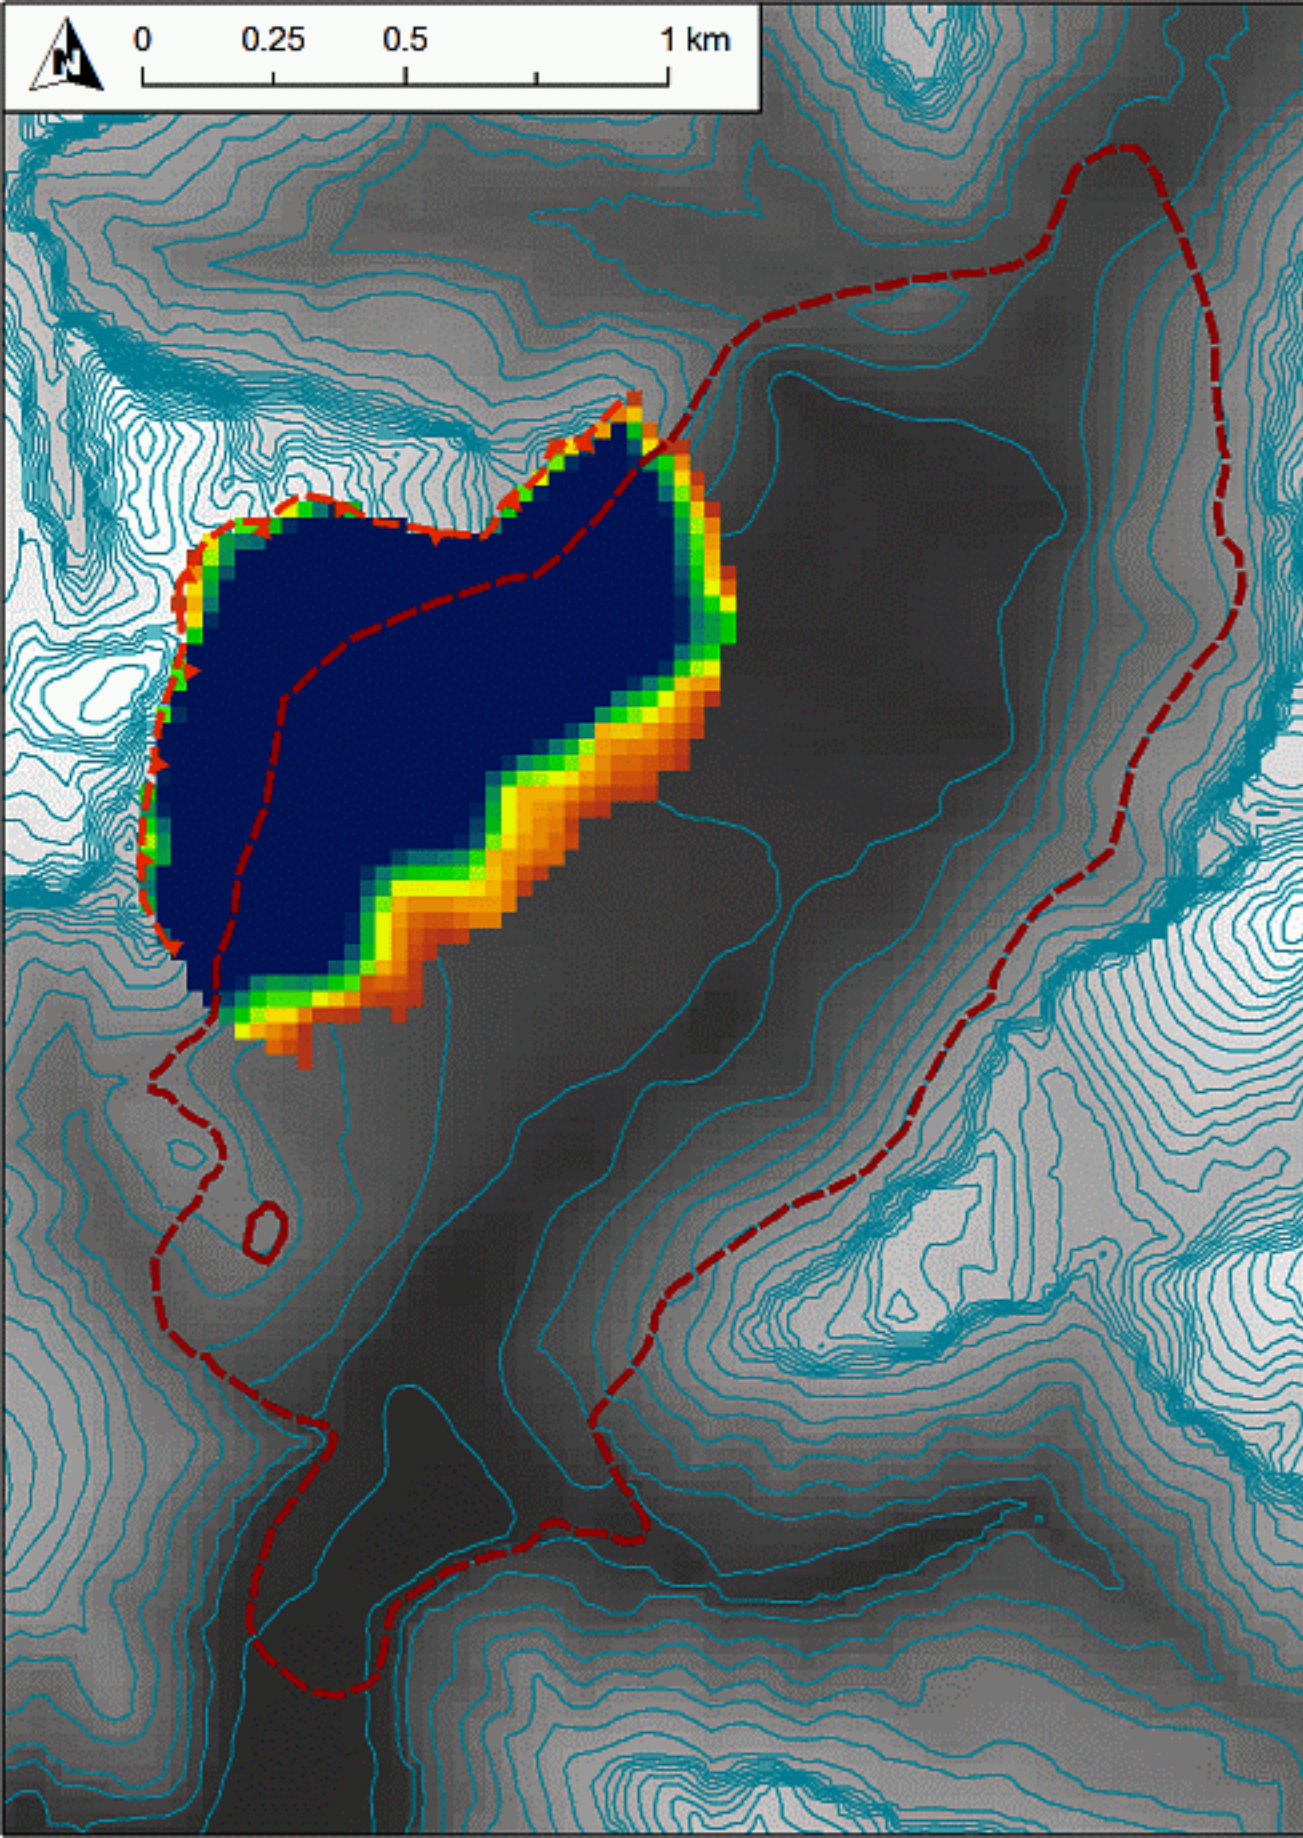

Supplement: Supplementary file 1 [file 1]
